# Supplementary material for: ICAM-1 Targeted Drug Combination Nanoparticles Enhanced Gemcitabine-Paclitaxel Exposure and Breast Cancer Suppression in Mouse Models
Source: MDPI journal article supplement (doi:10.3390/pharmaceutics14010089), 2021-12-31
Supplement: s1 [file s1]

# Supplementary Materials: ICAM-1 Targeted Drug Combination Nanoparticles Enhanced Gemcitabine-Paclitaxel Exposure and Breast Cancer Suppression in Mouse Models

Linxi Zhu, Qingxin Mu, Jesse Yu, James I. Griffin, Xiaolin Xu and Rodney J. Y. Ho

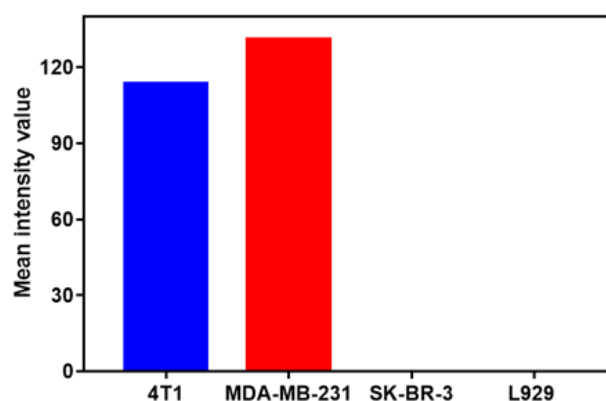

**Figure S1.** Mean intensity values of ICAM-1 fluorescence signal in Figure 1 for different cells. The values were quantified by Image J.

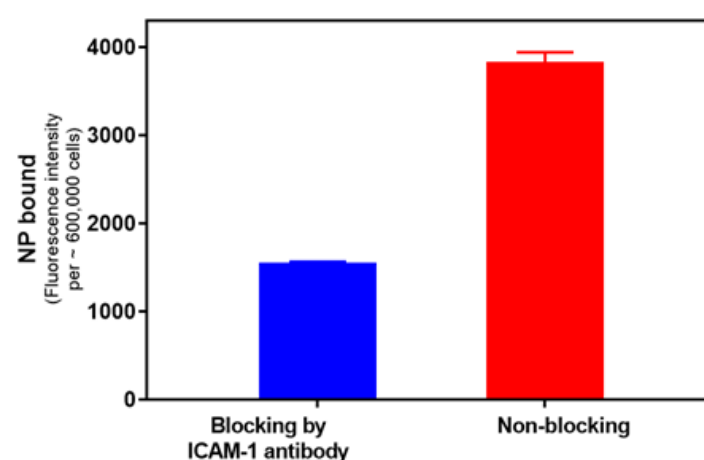

**Figure S2.** Effects of ICAM-1 blocking on 4T1 cellular binding of ICG-labeled nanoparticles. 4T1 cells were seeded on a 12-well plate (300,000 cells/well) and incubated overnight. Blocking group was pre-incubated with ICAM-1 polyclonal antibody at 37 °C for 30 min (11 µg/mL). After removal of antibody, ICG-labeled NP with 1% LFA1-P of 1 mM (lipid concentration) were added into wells, and plates were incubated at 4 °C for 1 h. Cells were then lysed by DMSO and the ICG Fluorescence intensity was measured in a micro-plate reader and the values are presented as mean ± SD of the replicates.

**Table S1.** IC<sub>50</sub> and combination index (CI) calculation of GT combination in MDA-MB-231 cells after a 5-day incubation. CI was calculated based on the Chou-Talalay formula (Cancer Res., 2010, 70(2), 440-6.).

|                                            | IC <sub>50</sub> (ng/mL, single drug) | IC <sub>50</sub> (ng/mL, in combination, 10/1<br>w/w) |
|--------------------------------------------|---------------------------------------|-------------------------------------------------------|
| Gemcitabine                                | 0.92                                  | 0.77                                                  |
| Paclitaxel                                 | 1.27                                  | 0.077                                                 |
| Combination index at IC <sub>50</sub> (CI) | n/a                                   | 0.9                                                   |

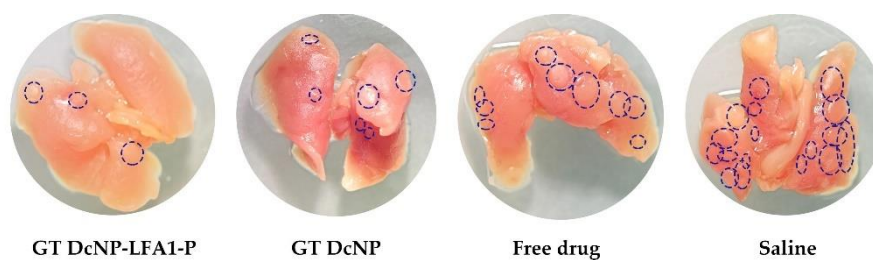

**Figure S3.** Representative lung image with different treatments in 4T1 tumor inhibition study in correlation with Figure 6. After the mice were euthanized at day 14, tissues were fixed with 10% formalin for at least 24 h, and then stored in 70% ethanol. The images were taken by a dissection microscope. Dark blue dashed circles in the figure indicate nodule margins in the lungs.
